# Supplementary material for: A novel functional group difference-based selective etching strategy for the synthesis of hollow organic silica nanospheres
Source: Royal Society of Chemistry journal article supplement (doi:10.1039/c5ra25161c), 2016-01-01
Supplement: c5ra25161c1.pdf [file c5ra25161c1.pdf]

## A novel functional group difference-based selective etching strategy for the synthesis of hollow organic silica nanospheres

Fanlong Zeng,<sup>a</sup> Lianxi Chen,<sup>\*a</sup> Jie Li,<sup>ab</sup> Xinshan Ye,<sup>c</sup> Huogen Yu,<sup>a</sup> Zhenhui Liu<sup>a</sup>

<sup>a</sup> School of Chemistry, Chemical Engineering and Life Sciences, Wuhan University of Technology, Wuhan, 430070, P. R. China. E-mail: [clx@whut.edu.cn](mailto:clx@whut.edu.cn).

<sup>b</sup> School of Materials Science and Engineering, Wuhan University of Technology, Wuhan, 430070, P. R. China.

<sup>c</sup> State Key Laboratory of Natural and Biomimetic Drugs, Peking University, Beijing, 100191, P. R. China.

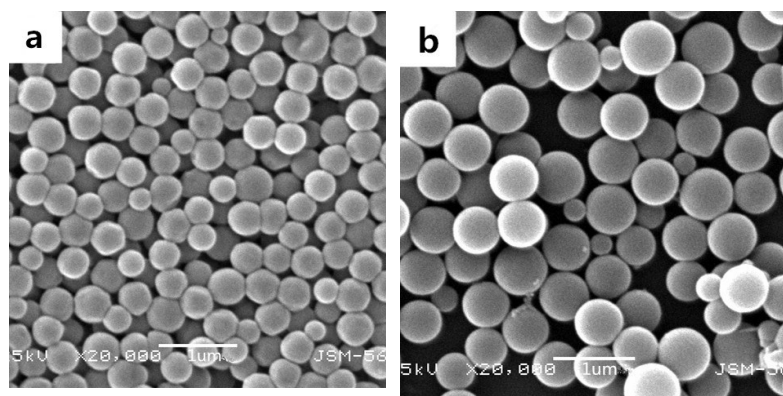

Fig. S1. Typical SEM images of the initial (a) VTES@TCPTES by hydrothermal treatment and (b) TEOS@TCPTES by hydrothermal treatment, respectively.

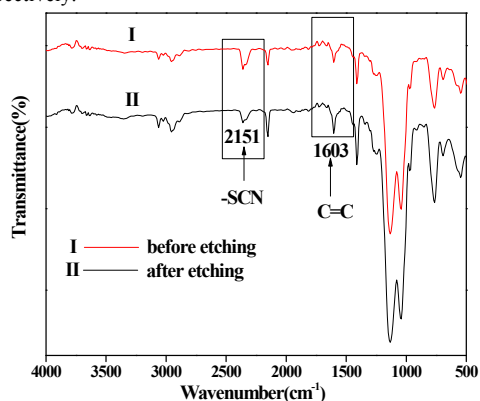

Fig. S2. Typical SEM images of the initial VTES@TCPTES by hydrothermal treatment (I) and VTES@TCPTES by hydrothermal treatment in  $\text{Na}_2\text{CO}_3$  solution at 50 °C for 10 h, respectively.

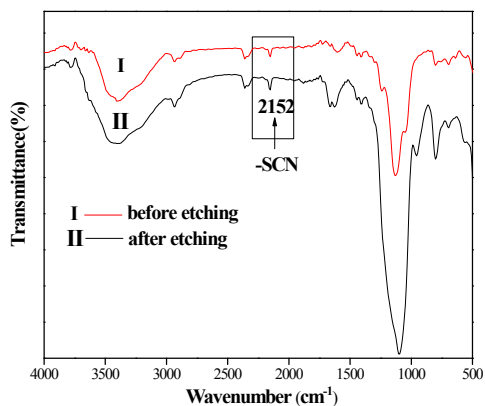

Fig. S3. Typical SEM images of (I) the initial TEOS@TCPTES by hydrothermal treatment and (II) TEOS@TCPTES by hydrothermal treatment in  $\text{Na}_2\text{CO}_3$  solution at 50 °C for 10 h, respectively.
